# Supplementary material for: Rapid isolation of dengue-neutralizing antibodies from single cell-sorted human antigen-specific memory B-cell cultures
Source: PubMed Central journal article supplement — MAbs. 2015 Oct 22;8(1):129–40. doi: 10.1080/19420862.2015.1109757 (PMC4966506; doi:10.1080/19420862.2015.1109757), 2015-10-22
Supplement: kmab-08-01-1109757-s001.pdf [file kmab-08-01-1109757-s001.pdf]

# Rapid isolation of dengue-neutralizing antibodies from single cell-sorted human antigen-specific memory B-cell cultures

Kara S. Cox<sup>a</sup>, Aimin Tang<sup>a</sup>, Zhifeng Chen<sup>a</sup>, Melanie S. Horton<sup>a</sup>, Hao Yan<sup>a</sup>, Xin-Min Wang<sup>a</sup>, Sheri A. Dubey<sup>a</sup>, Daniel J. DiStefano<sup>a</sup>, Andrew Ettenger<sup>b</sup>, Rachel H. Fong<sup>b</sup>, Benjamin J. Doranz<sup>b</sup>, Danilo R. Casimiro<sup>a</sup> and Kalpit A. Vora<sup>a</sup>

<sup>a</sup> Department of Infectious Diseases and Vaccines-West Point, PA, Merck Research Laboratories, Merck & Co., Inc. Kenilworth, NJ USA

<sup>b</sup> Integral Molecular Inc. , Philadelphia, PA USA

Corresponding author: Kalpit A. Vora; [kalpit.vora@merck.com](mailto:kalpit.vora@merck.com)

**Supplemental Table 1**

| Mab         | HCDR3           | Kappa CDR3 | Lambda CDR3 |
|-------------|-----------------|------------|-------------|
| <b>DB5</b>  | DDGGSYGFDY      |            | QTWDTTTHVV  |
| <b>DB6</b>  | PITSVAGGGTWFD P | QQYDSFPIT  |             |
| <b>DC11</b> | QEVAVAGNSY      | QQRNYWPHT  |             |
| <b>DC4</b>  | RPWTMPSDY       | QQYDNWPWT  |             |
| <b>DC6</b>  | RPWTYAHFDY      | QQYGSSPLT  |             |
| <b>DH1</b>  | DCSPTTCYFQ      | QQSYNDPRT  |             |
| <b>DD1L</b> | GEQWPSDF        |            | ATWDDRVSGPV |
| <b>DD1K</b> | DSHQWLAYDF      | QQRSNWPRDT |             |
| <b>DD12</b> | TSNRDGPLVDY     | QQTYITPRT  |             |

**Table S1 Monoclonal Antibody CDR<sub>3H</sub> and CDR<sub>3L</sub> sequences**

Heavy and Light chain sequences from the CDR3 regions of each of the human mAbs which displayed neutralizing activity are listed.
